# Supplementary material
Source: publisher figshare collection journal article supplement (https://gsapubs.figshare.com/ndownloader/files/26669585)
Supplement: Supplementary file 1 [file 26669585]

## Sheet: Sheet1
Supplementary Data 6. Mean and standard deviation of melanosome measurements (nm) in untreated and matured samples from the african clawed frog skin and liver.
Expertiments	length	st. dev	width	st. dev	ratio	st. dev
mat_Cu_liver	644.4	154.731	474.2	114.107	0.743283	0.107549
mat_Cu_skin	628.867	91.6188	438.8	63.5517	0.706251	0.108212
mat_DD_liver	753.8	122.599	566.667	92.4075	0.759354	0.110353
mat_DD_skin	668.667	86.6735	453.2	51.4921	0.686733	0.103926
liver	722.4	140.844	509.6	78.4059	0.719333	0.121835
skin	692.133	103.616	468.867	78.6764	0.684867	0.11489

## Sheet: G48696
Rossi, V., Webb, S.M., and McNamara, M., 2021, Maturation experiments reveal bias in the chemistry of fossil melanosomes: Geology, v. 49, https://doi.org/10.1130/G48696.1
